# Supplementary material for: Engineering a polyoxometalate-based metal organic framework with more exposed active edge sites of Ag for visible light-driven selective oxidation of cis-cyclooctene
Source: Royal Society of Chemistry journal article supplement (doi:10.1039/c8qi00648b), 2018-01-01
Supplement: c8qi00648b1.pdf [file c8qi00648b1.pdf]

# Engineering polyoxometalates-based metal organic framework with more exposed active edge sites of Ag for visible light-driven selective oxidation of *cis*-cyclooctene

## Supporting Information

**Table S1.** Selected bond lengths (Å) and bond angles (°) for compound **1**.

|                      |           |                     |           |
|----------------------|-----------|---------------------|-----------|
| Ag(4)-N(6)#2         | 2.249(17) | Ag(4)-N(5)          | 2.306(17) |
| Ag(4)-S(2)#3         | 2.646(6)  | Ag(1)-N(2)          | 2.27(2)   |
| Ag(1)-N(4)#4         | 2.33(2)   | Ag(1)-O(1W)         | 2.50(3)   |
| Ag(1)-O(12)          | 2.544(18) | Ag(1)-S(1)          | 2.863(6)  |
| Ag(2)-N(8)#2         | 2.241(19) | Ag(2)-N(1)          | 2.401(19) |
| Ag(2)-S(1)           | 2.564(6)  | Ag(3)-N(3)          | 2.183(18) |
| Ag(3)-N(7)#5         | 2.200(19) | Ag(3)-O(22)#6       | 2.54(2)   |
| N(4)-Ag(1)#2         | 2.33(2)   | N(7)-Ag(3)#7        | 2.200(19) |
| N(6)-Ag(4)#4         | 2.249(17) | N(8)-Ag(2)#4        | 2.241(19) |
| O(22)-Ag(3)#8        | 2.54(2)   | S(2)-Ag(4)#9        | 2.646(6)  |
| N(6)#2-Ag(4)-N(5)    | 124.6(6)  | N(6)#2-Ag(4)-S(2)#3 | 124.1(5)  |
| N(5)-Ag(4)-S(2)#3    | 106.3(5)  | N(2)-Ag(1)-N(4)#4   | 128.0(7)  |
| N(2)-Ag(1)-O(1W)     | 116.1(10) | N(4)#4-Ag(1)-O(1W)  | 114.7(10) |
| N(2)-Ag(1)-O(12)     | 101.2(7)  | N(4)#4-Ag(1)-O(12)  | 81.9(7)   |
| O(1W)-Ag(1)-O(12)    | 74.2(9)   | N(2)-Ag(1)-S(1)     | 91.5(6)   |
| N(4)#4-Ag(1)-S(1)    | 96.8(5)   | O(1W)-Ag(1)-S(1)    | 93.0(8)   |
| O(12)-Ag(1)-S(1)     | 164.9(5)  | N(8)#2-Ag(2)-N(1)   | 118.8(7)  |
| N(8)#2-Ag(2)-S(1)    | 130.1(5)  | N(1)-Ag(2)-S(1)     | 89.7(4)   |
| N(3)-Ag(3)-N(7)#5    | 139.6(7)  | N(3)-Ag(3)-O(22)#6  | 84.9(7)   |
| N(7)#5-Ag(3)-O(22)#6 | 89.6(7)   |                     |           |

Symmetry codes for **1**: #1 -x,-y,-z+1 #2 x, -y+1/2, z-1/2 #3 x+1, -y+1/2, z+1/2 #4 x, -y+1/2, z+1/2 #5 x-1, y, z-1 #6 x, y, z-1 #7 x+1, y, z+1 #8 x, y, z+1 #9 x-1, -y+1/2, z-1/2.

**Table S2.** Selected bond lengths (Å) and bond angles (°) for compound **2**.

---

|                    |           |                    |            |
|--------------------|-----------|--------------------|------------|
| Ag(1)-N(1)         | 2.167(10) | Ag(1)-S(1)         | 2.433(3)   |
| Ag(1)-O(4)         | 2.505(8)  | Ag(1)-Ag(1)#2      | 2.9545(19) |
| Ag(2)-N(8)#3       | 2.192(9)  | Ag(2)-N(4)         | 2.224(10)  |
| Ag(2)-N(6)         | 2.346(10) | Ag(3)-N(5)#4       | 2.255(9)   |
| Ag(3)-N(7)         | 2.307(10) | Ag(3)-N(3)         | 2.358(10)  |
| Ag(4)-N(2)         | 2.254(10) | Ag(4)-O(1W)        | 2.414(10)  |
| Ag(4)-S(2)         | 2.477(4)  | N(5)-Ag(3)#3       | 2.255(9)   |
| N(8)-Ag(2)#4       | 2.191(9)  |                    |            |
| N(1)-Ag(1)-S(1)    | 170.8(3)  | N(1)-Ag(1)-O(4)    | 103.0(3)   |
| S(1)-Ag(1)-O(4)    | 81.0(2)   | N(1)-Ag(1)-Ag(1)#2 | 86.4(3)    |
| S(1)-Ag(1)-Ag(1)#2 | 87.07(8)  | O(4)-Ag(1)-Ag(1)#2 | 158.1(2)   |
| N(8)#3-Ag(2)-N(4)  | 142.9(4)  | N(8)#3-Ag(2)-N(6)  | 118.9(4)   |
| N(4)-Ag(2)-N(6)    | 96.4(4)   | N(5)#4-Ag(3)-N(7)  | 121.3(4)   |
| N(5)#4-Ag(3)-N(3)  | 126.7(4)  | N(7)-Ag(3)-N(3)    | 97.6(4)    |
| N(2)-Ag(4)-O(1W)   | 113.1(4)  | N(2)-Ag(4)-S(2)    | 139.7(3)   |
| O(1W)-Ag(4)-S(2)   | 106.3(3)  |                    |            |

---

Symmetry codes for **2**: #1 -x, y, -z+1/2 #2 -x+1/2, y+1/2, -z+3/2 #3 -x+1/2, y-1/2, -z+3/2 #4 -x, -y+2, -z+1.

**Table S3.** Crystal data and structure refinements for compound **1** and **2**.

|                                                                                           | <b>1</b>                                                                                                       | <b>2</b>                                                                                                        |
|-------------------------------------------------------------------------------------------|----------------------------------------------------------------------------------------------------------------|-----------------------------------------------------------------------------------------------------------------|
| formula                                                                                   | C <sub>8</sub> H <sub>20</sub> Ag <sub>8</sub> N <sub>16</sub> S <sub>4</sub> O <sub>48</sub> PW <sub>12</sub> | C <sub>8</sub> H <sub>18</sub> Ag <sub>8</sub> N <sub>16</sub> S <sub>4</sub> O <sub>42</sub> PMo <sub>12</sub> |
| <i>F</i> w                                                                                | 4328.59                                                                                                        | 3177.79                                                                                                         |
| crystal system                                                                            | Monoclinic                                                                                                     | Monoclinic                                                                                                      |
| space group                                                                               | P2(1)/c                                                                                                        | C2/c                                                                                                            |
| <i>a</i> (Å)                                                                              | 13.0330(19)                                                                                                    | 24.880(5)                                                                                                       |
| <i>b</i> (Å)                                                                              | 22.665(3)                                                                                                      | 10.683(2)                                                                                                       |
| <i>c</i> (Å)                                                                              | 11.9449(16)                                                                                                    | 22.308(4)                                                                                                       |
| $\beta$ (°)                                                                               | 116.967(2)                                                                                                     | 106.567(4)                                                                                                      |
| <i>V</i> (Å <sup>3</sup> )                                                                | 3144.8(8)                                                                                                      | 5683.3(19)                                                                                                      |
| <i>Z</i>                                                                                  | 2                                                                                                              | 4                                                                                                               |
| <i>D</i> <sub>c</sub> (g·cm <sup>-3</sup> )                                               | 4.571                                                                                                          | 3.714                                                                                                           |
| $\mu$ (mm <sup>-1</sup> )                                                                 | 24.535                                                                                                         | 5.518                                                                                                           |
| <i>F</i> (000)                                                                            | 3798                                                                                                           | 5868                                                                                                            |
| R <sub>int</sub>                                                                          | 0.0408                                                                                                         | 0.0734                                                                                                          |
| final <i>R</i> <sub>1</sub> <sup>a</sup> , <i>wR</i> <sub>2</sub> <sup>b</sup> (all data) | 0.0778 0.2391                                                                                                  | 0.0612 0.1920                                                                                                   |
| GOF on <i>F</i> <sup>2</sup>                                                              | 1.620                                                                                                          | 1.095                                                                                                           |

**Table S4.** Coordination modes of Ag<sup>I</sup> ions in compounds **1** and **2**.

| Compound                                                                                                                                                                                                                                                                                                                                        | 1                                                                                                                                                                                                                                                                                                                                               | 2 |
|-------------------------------------------------------------------------------------------------------------------------------------------------------------------------------------------------------------------------------------------------------------------------------------------------------------------------------------------------|-------------------------------------------------------------------------------------------------------------------------------------------------------------------------------------------------------------------------------------------------------------------------------------------------------------------------------------------------|---|
| Coordination modes of Silver ions                                                                                                                                                                                                                                                                                                               | 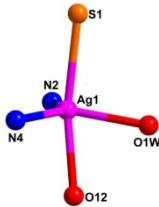 A central silver ion (Ag1) is coordinated to four ligands: a sulfur atom (S1) at the top, an oxygen atom (O12) at the bottom, and two nitrogen atoms (N2 and N4) on the left side. An oxygen atom (O1W) is also coordinated to the right side of the Ag1 ion. |   |
|                                                                                                                                                                                                                                                                                                                                                 |  A central silver ion (Ag2) is coordinated to three ligands: a nitrogen atom (N8) at the top, a nitrogen atom (N1) at the bottom left, and a sulfur atom (S1) at the bottom right.                                                                             |   |
|                                                                                                                                                                                                                                                                                                                                                 |  A central silver ion (Ag3) is coordinated to four ligands: a nitrogen atom (N3) at the top, a nitrogen atom (N7) at the bottom, and two oxygen atoms (O22 and O18) on the left and right sides respectively.                                                 |   |
|                                                                                                                                                                                                                                                                                                                                                 |  A central silver ion (Ag4) is coordinated to four ligands: an oxygen atom (O13) at the top, a sulfur atom (S2) at the bottom left, and two nitrogen atoms (N5 and N6) on the right side.                                                                    |   |
|  A central silver ion (Ag1) is coordinated to five ligands: a nitrogen atom (N1) at the top left, an oxygen atom (O20) at the top, a sulfur atom (S1) at the bottom right, and two oxygen atoms (O19 and O4) at the bottom.                                   |                                                                                                                                                                                                                                                                                                                                                 |   |
|  A central silver ion (Ag2) is coordinated to five ligands: an oxygen atom (O6) at the top, a nitrogen atom (N4) at the top left, a nitrogen atom (N8) at the top right, and two oxygen atoms (N6 and O12) at the bottom.                                    |                                                                                                                                                                                                                                                                                                                                                 |   |
|  A central silver ion (Ag3) is coordinated to five ligands: an oxygen atom (O1W) at the top, a nitrogen atom (N3) at the bottom left, a nitrogen atom (N5) at the bottom right, and two oxygen atoms (N7 and O18) on the left and right sides respectively. |                                                                                                                                                                                                                                                                                                                                                 |   |
|  A central silver ion (Ag4) is coordinated to five ligands: an oxygen atom (O2) at the top, a sulfur atom (S2) at the bottom left, a nitrogen atom (N2) at the bottom right, and two oxygen atoms (O1W and O13) on the left and right sides respectively.  |                                                                                                                                                                                                                                                                                                                                                 |   |

**Table S5.** Selective oxidation of *cis*-cyclooctene using compounds **1** and Materials of **1** as photocatalysts under visible light irradiation. <sup>a</sup>

| Reaction time (h) | Compound <b>1</b> |                                                                                   |                                                                                   |                                                | Materials of <b>1</b> |                                                                                     |                                                                                     |                                                |
|-------------------|-------------------|-----------------------------------------------------------------------------------|-----------------------------------------------------------------------------------|------------------------------------------------|-----------------------|-------------------------------------------------------------------------------------|-------------------------------------------------------------------------------------|------------------------------------------------|
|                   | Conversion (%)    | Product selectivity (%)                                                           |                                                                                   |                                                | Conversion (%)        | Product selectivity (%)                                                             |                                                                                     |                                                |
|                   |                   | 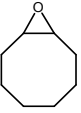 |  | $\Sigma_{\text{sel}}\text{C}_8^{\text{b}}$ (%) |                       |  |  | $\Sigma_{\text{sel}}\text{C}_8^{\text{b}}$ (%) |
| 0                 | 0                 | 0                                                                                 | 0                                                                                 | 0                                              | 0                     | 0                                                                                   | 0                                                                                   | 0                                              |
| 8                 | 38.12             | 99.42                                                                             | 0.56                                                                              | 99.98                                          | 11.17                 | 86.45                                                                               | 4.56                                                                                | 91.01                                          |
| 16                | 45.95             | 99.57                                                                             | 0.40                                                                              | 99.97                                          | 15.39                 | 86.17                                                                               | 4.43                                                                                | 90.60                                          |
| 24                | 66.52             | 99.69                                                                             | 0.22                                                                              | 99.91                                          | 19.52                 | 85.75                                                                               | 4.23                                                                                | 89.98                                          |
| 32                | 70.15             | 99.68                                                                             | 0.15                                                                              | 99.83                                          | 22.14                 | 85.58                                                                               | 4.05                                                                                | 89.63                                          |

<sup>a</sup>Reaction condition: catalyst (100 mg), *cis*-cyclooctene (10 ml), H<sub>2</sub>O<sub>2</sub> (30%, 10 ml), 70°C, under illumination (300 W Xe lamp;  $\lambda > 460$  nm; light intensity: 80 mW).

<sup>b</sup>Total selectivity to C<sub>8</sub> partial oxidation products.

**Table S6.** Selective oxidation of *cis*-cyclooctene using compounds **2** and Materials of **2** as photocatalysts under visible light irradiation. <sup>a</sup>

| Reaction time (h) | Compound <b>2</b> |                                                                                     |                                                                                     |                                                | Materials of <b>2</b> |                                                                                       |                                                                                       |                                                |
|-------------------|-------------------|-------------------------------------------------------------------------------------|-------------------------------------------------------------------------------------|------------------------------------------------|-----------------------|---------------------------------------------------------------------------------------|---------------------------------------------------------------------------------------|------------------------------------------------|
|                   | Conversion (%)    | Product selectivity (%)                                                             |                                                                                     |                                                | Conversion (%)        | Product selectivity (%)                                                               |                                                                                       |                                                |
|                   |                   | 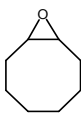 |  | $\Sigma_{\text{sel}}\text{C}_8^{\text{b}}$ (%) |                       |  |  | $\Sigma_{\text{sel}}\text{C}_8^{\text{b}}$ (%) |
| 0                 | 0                 | 0                                                                                   | 0                                                                                   | 0                                              | 0                     | 0                                                                                     | 0                                                                                     | 0                                              |
| 8                 | 28.89             | 99.27                                                                               | 0.58                                                                                | 99.85                                          | 12.12                 | 87.42                                                                                 | 2.56                                                                                  | 89.98                                          |
| 16                | 38.84             | 99.21                                                                               | 0.54                                                                                | 99.75                                          | 15.93                 | 87.27                                                                                 | 2.53                                                                                  | 89.80                                          |
| 24                | 54.99             | 99.17                                                                               | 0.44                                                                                | 99.61                                          | 18.52                 | 87.35                                                                                 | 2.22                                                                                  | 89.57                                          |
| 32                | 63.93             | 99.35                                                                               | 0.18                                                                                | 99.53                                          | 20.14                 | 87.47                                                                                 | 2.05                                                                                  | 89.52                                          |

<sup>a</sup>Reaction condition: catalyst (100 mg), *cis*-cyclooctene (10 ml), H<sub>2</sub>O<sub>2</sub> (30%, 10 ml), 70°C, under illumination (300 W Xe lamp;  $\lambda > 460$  nm; light intensity: 80 mW).

<sup>b</sup>Total selectivity to C<sub>8</sub> partial oxidation products.

**Table S7.** The conversion of *cis*-cyclooctene and the selectivity to epoxycyclooctane with different components as catalysts.<sup>a</sup>

| Reaction Time (h) | PMo <sub>12</sub>                          |                         | PW <sub>12</sub>     |                         |
|-------------------|--------------------------------------------|-------------------------|----------------------|-------------------------|
|                   | Conversion (%)                             | Product selectivity (%) | Conversion (%)       | Product selectivity (%) |
| 0                 | 0                                          | 0                       | 0                    | 0                       |
| 8                 | 6.20                                       | 83.67                   | 7.20                 | 77.67                   |
| 16                | 6.33                                       | 85.95                   | 7.43                 | 85.55                   |
| 24                | 7.12                                       | 86.73                   | 7.98                 | 86.33                   |
| 32                | 7.54                                       | 87.26                   | 8.54                 | 88.25                   |
|                   | mttz                                       |                         | Ag <sup>+</sup> ion  |                         |
|                   | Conversion (%)                             | Product selectivity (%) | Conversion (%)       | Product selectivity (%) |
| 0                 | 0                                          | 0                       | 0                    | 0                       |
| 8                 | 1.28                                       | 93.84                   | 8.67                 | 94.13                   |
| 16                | 2.17                                       | 94.57                   | 11.16                | 95.76                   |
| 24                | 2.32                                       | 95.78                   | 13.34                | 96.32                   |
| 32                | 2.45                                       | 95.96                   | 13.82                | 96.98                   |
|                   | H <sub>2</sub> O <sub>2</sub> <sup>b</sup> |                         | Ag-PW <sub>12</sub>  |                         |
|                   | Conversion (%)                             | Product selectivity (%) | Conversion (%)       | Product selectivity (%) |
| 0                 | 0                                          | 0                       | 0                    | 0                       |
| 8                 | 1.54                                       | 93.54                   | 8.09                 | 93.64                   |
| 16                | 1.07                                       | 94.53                   | 12.36                | 95.03                   |
| 24                | 1.42                                       | 95.28                   | 13.47                | 95.37                   |
| 32                | 1.89                                       | 95.36                   | 14.20                | 95.58                   |
|                   | Ag-mttz                                    |                         | Ag-PMo <sub>12</sub> |                         |
|                   | Conversion (%)                             | Product selectivity (%) | Conversion (%)       | Product selectivity (%) |
| 0                 | 0                                          | 0                       | 0                    | 0                       |
| 8                 | 7.56                                       | 92.44                   | 8.27                 | 94.66                   |
| 16                | 10.09                                      | 93.57                   | 12.06                | 95.63                   |
| 24                | 11.57                                      | 94.05                   | 13.85                | 96.07                   |
| 32                | 11.99                                      | 94.12                   | 14.32                | 96.32                   |

<sup>a</sup>Reaction condition: catalyst (100 mg), *cis*-cyclooctene (10 ml), H<sub>2</sub>O<sub>2</sub> (30%, 10 ml), 70°C, under illumination (300 W Xe lamp;  $\lambda > 460$  nm; light intensity: 80 mW).

<sup>b</sup>Reaction condition: *cis*-cyclooctene (10 ml), H<sub>2</sub>O<sub>2</sub> (30%, 20 ml), 70°C, under illumination (300 W Xe lamp;  $\lambda > 460$  nm; light intensity: 80 mW).

**Table S8.** Selective oxidation of *cis*-cyclooctene with compounds **1** and **2** as catalysts in dark. <sup>a</sup>

| Dark reaction time (h) | Compound 1     |                                                                                   |                                                                                   |                                                | Compound 2     |                                                                                     |                                                                                     |                                                |
|------------------------|----------------|-----------------------------------------------------------------------------------|-----------------------------------------------------------------------------------|------------------------------------------------|----------------|-------------------------------------------------------------------------------------|-------------------------------------------------------------------------------------|------------------------------------------------|
|                        | Conversion (%) | Product selectivity (%)                                                           |                                                                                   |                                                | Conversion (%) | Product selectivity (%)                                                             |                                                                                     |                                                |
|                        |                | 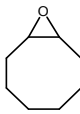 |  | $\Sigma_{\text{sel}}\text{C}_8^{\text{b}}$ (%) |                |  |  | $\Sigma_{\text{sel}}\text{C}_8^{\text{b}}$ (%) |
| 0                      | 0              | 0                                                                                 | 0                                                                                 | 0                                              | 0              | 0                                                                                   | 0                                                                                   | 0                                              |
| 8                      | 3.25           | 96.07                                                                             | 3.58                                                                              | 99.65                                          | 3.12           | 95.21                                                                               | 4.34                                                                                | 99.55                                          |
| 16                     | 5.69           | 95.20                                                                             | 3.52                                                                              | 98.72                                          | 5.45           | 95.28                                                                               | 4.09                                                                                | 99.37                                          |
| 24                     | 9.10           | 94.22                                                                             | 3.44                                                                              | 97.66                                          | 7.52           | 94.95                                                                               | 3.94                                                                                | 98.89                                          |
| 32                     | 9.24           | 93.83                                                                             | 3.46                                                                              | 97.29                                          | 9.17           | 95.23                                                                               | 3.37                                                                                | 98.60                                          |

<sup>a</sup>Reaction condition: catalyst (100 mg), *cis*-cyclooctene (10 ml), H<sub>2</sub>O<sub>2</sub> (30%, 10 ml) 70°C, in dark.

<sup>b</sup>Total selectivity to C<sub>8</sub> partial oxidation products.

**Table S9.** The conversion of *cis*-cyclooctene and the selectivity to epoxycyclooctane with different reaction conditions. <sup>a</sup>

| photocatalyst | T. | Conv. (%) | Select. (%) | light intensity | Conv. (%) | Select. (%) | wavelength | Conv. (%) | Select. (%) |
|---------------|----|-----------|-------------|-----------------|-----------|-------------|------------|-----------|-------------|
| compound 1    | 25 | 2.09      | 84.82       | 20              | 26.31     | 94.42       | 340        | 38.12     | 94.12       |
|               | 40 | 5.99      | 90.23       | 40              | 42.03     | 94.55       | 460        | 70.13     | 99.27       |
|               | 50 | 11.85     | 94.75       | 60              | 54.78     | 95.91       | 540        | 20.32     | 96.55       |
|               | 60 | 26.31     | 96.68       | 80              | 70.15     | 99.58       | 630        | 15.39     | 96.68       |
|               | 70 | 70.15     | 99.68       | 100             | 70.16     | 99.44       | 700        | 14.23     | 96.44       |
| Compound 2    | 25 | 1.99      | 88.35       | 20              | 18.58     | 89.68       | 340        | 13.93     | 98.35       |
|               | 40 | 4.87      | 89.12       | 40              | 38.56     | 90.05       | 460        | 63.55     | 99.12       |
|               | 50 | 10.21     | 90.21       | 60              | 49.99     | 94.86       | 540        | 26.58     | 99          |
|               | 60 | 19.89     | 96.37       | 80              | 63.93     | 98.87       | 630        | 13.55     | 98.37       |
|               | 70 | 63.93     | 99.35       | 100             | 63.98     | 98.80       | 700        | 13.93     | 98.35       |

<sup>a</sup>Reaction condition: catalyst (100 mg), *cis*-cyclooctene (10 ml), H<sub>2</sub>O<sub>2</sub> (30%, 10 ml), under illumination (300 W Xe lamp;  $\lambda > 460$  nm; light intensity: 80 mW).

**Table S10.** The cycle experiment of the selective oxidation of *cis*-cyclooctene using compounds **1** and **2** as photocatalysts.<sup>a</sup>

| Recycling times | Compound 1     |                                                                                   |                                                                                   |                                                | Compound 2     |                                                                                     |                                                                                     |                                                |
|-----------------|----------------|-----------------------------------------------------------------------------------|-----------------------------------------------------------------------------------|------------------------------------------------|----------------|-------------------------------------------------------------------------------------|-------------------------------------------------------------------------------------|------------------------------------------------|
|                 | Conversion (%) | Product selectivity (%)                                                           |                                                                                   |                                                | Conversion (%) | Product selectivity (%)                                                             |                                                                                     |                                                |
|                 |                | 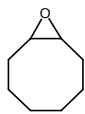 |  | $\Sigma_{\text{sel}}\text{C}_8^{\text{b}}$ (%) |                |  |  | $\Sigma_{\text{sel}}\text{C}_8^{\text{b}}$ (%) |
| 1               | 70.15          | 99.68                                                                             | 0.15                                                                              | 99.83                                          | 63.93          | 99.35                                                                               | 0.18                                                                                | 99.53                                          |
| 2               | 70.01          | 99.16                                                                             | 0.17                                                                              | 99.33                                          | 63.64          | 98.76                                                                               | 0.12                                                                                | 98.88                                          |
| 3               | 69.35          | 99.12                                                                             | 0.16                                                                              | 99.28                                          | 59.75          | 97.75                                                                               | 0.10                                                                                | 97.85                                          |
| 4               | 68.29          | 99.08                                                                             | 0.13                                                                              | 99.21                                          | 58.49          | 97.70                                                                               | 0.09                                                                                | 97.79                                          |
| 5               | 68.04          | 99.05                                                                             | 0.12                                                                              | 99.17                                          | 55.97          | 97.19                                                                               | 0.01                                                                                | 97.20                                          |

<sup>a</sup>Reaction condition: catalyst (100 mg), *cis*-cyclooctene (10 ml), H<sub>2</sub>O<sub>2</sub> (30%, 10 ml) 70°C, under illumination (300 W Xe lamp;  $\lambda > 460$  nm; light intensity: 80 mW).

<sup>b</sup>Total selectivity to C<sub>8</sub> partial oxidation products.

**Table S11.** The electrochemical band gaps of compound **1** and **2**.

| Catalyst   | Cyclic voltammetry    |                       | Band-gap/eV |
|------------|-----------------------|-----------------------|-------------|
|            | E <sub>HOMO</sub> /eV | E <sub>LUMO</sub> /eV |             |
| Compound 1 | -7.43                 | -4.43                 | 3.00        |
| Compound 2 | -7.35                 | -4.38                 | 2.97        |

E<sub>HOMO</sub> = - [E<sub>ox</sub> - E<sub>fe</sub> + 4.80] eV; E<sub>LUMO</sub> = - [E<sub>re</sub> - E<sub>fe</sub> + 4.80] eV. 4.8 eV is the energy level of ferrocene below the vacuum level. E<sub>ox</sub> and E<sub>re</sub> are the onset potentials for oxidation (E<sub>ox</sub>) and reduction (E<sub>re</sub>) in the CV curves of compounds **1-2** and the onset of the oxidation potential of ferrocene (E<sub>fe</sub>).<sup>1</sup>

#### References

1. D. Patra, C. C. Chiang, W. A. Chen, K. H. Wei, M. C. Wu and C. W. Chu. *J. Mater. Chem. A*, 2013, **1**, 7767-7774.



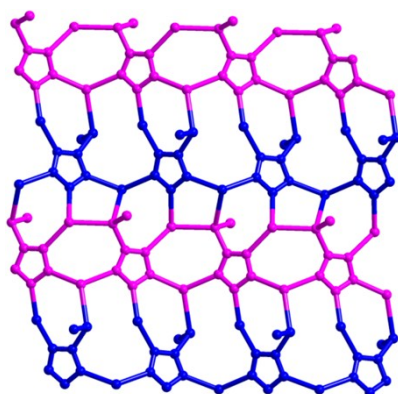

**Figure S1.** 2D layer in compound **1** constructed by adjacent two chains (blue: A-type chain, pink: B-type chain).

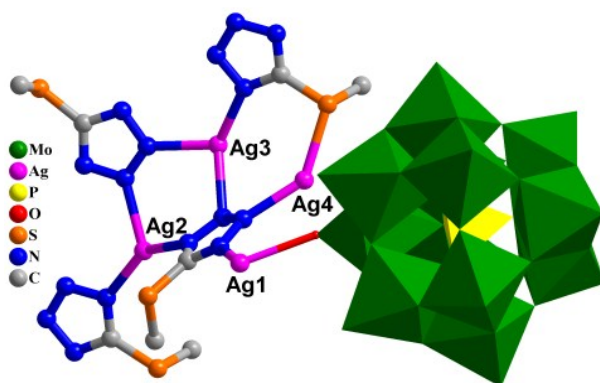

**Figure S2.** Ball and stick view of the asymmetric unit of compound **2** (hydrogen atoms are omitted for clarity).

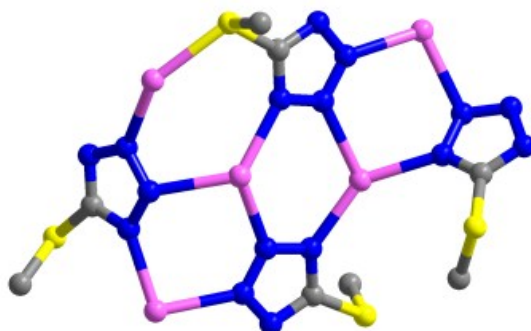

**Figure S3.** Ball and stick view of the  $[Ag_5mttz_4]$  subunit in compound **2**.

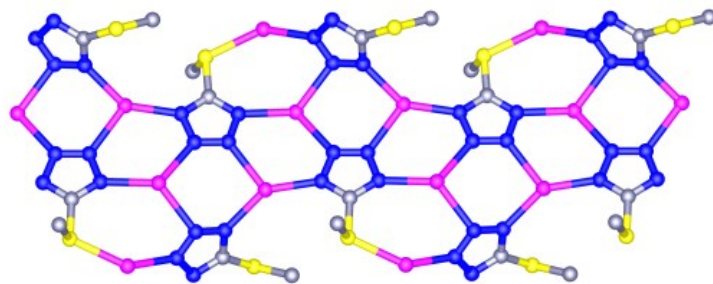

**Figure S4.** 1D Ag ribbon is formed by  $[Ag_5mttz_4]$  subunit in compound **2**.

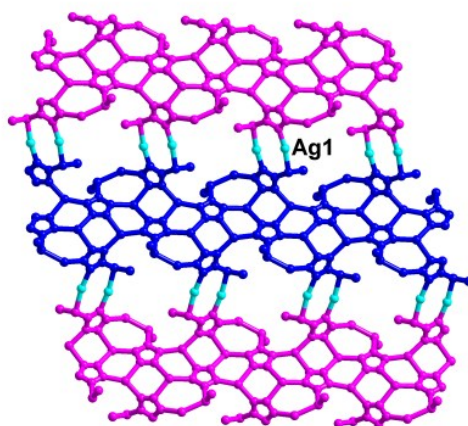

**Figure S5.** 2D layer in compound **2** constructed by adjacent 1D Ag ribbons with S1-Ag1-N1 subunits (pink and blue: 1D Ag ribbon)

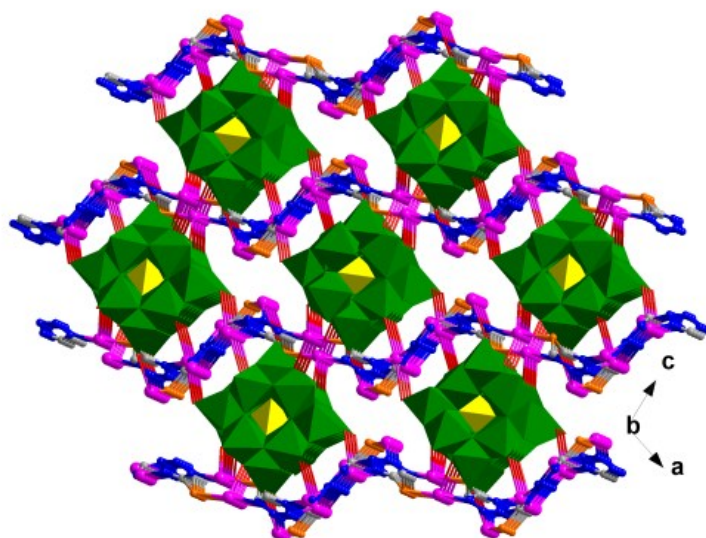

**Figure S6.** The schematic view of the 3D framework in compound **2**.

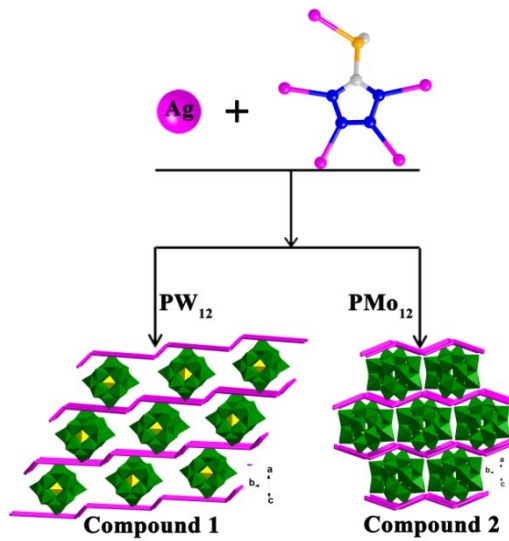

Figure S7. Schematic of synthetic route for compounds 1-2.

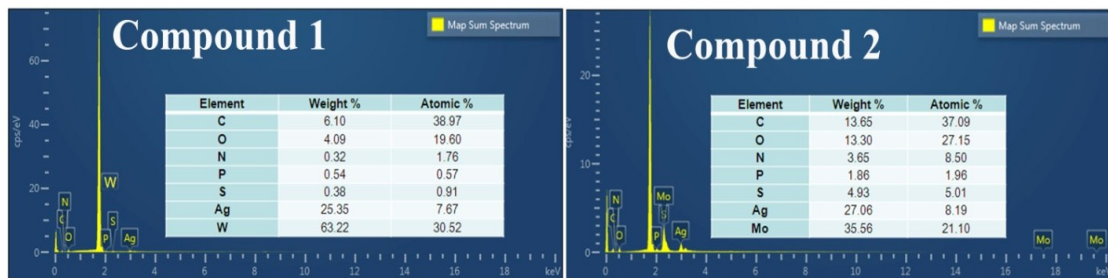

Figure S8. EDS spectra of compounds 1 and 2.

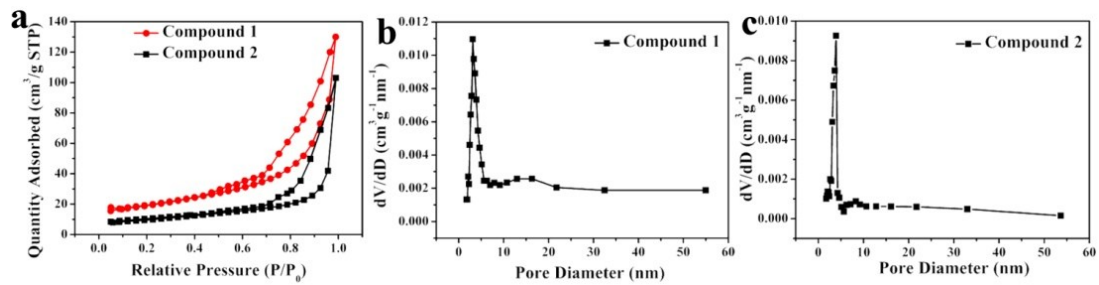

Figure S9. The  $\text{N}_2$  adsorption-desorption isotherms and pore size distribution curves of compound 1 and 2.

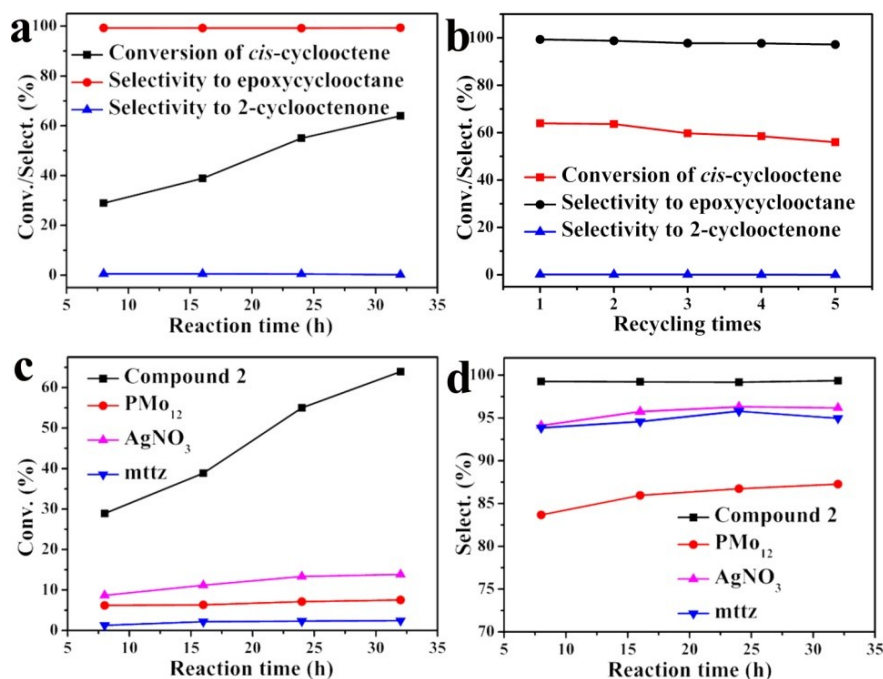

**Figure S10.** (a) The relationship between the conversion of *cis*-cyclooctene/selectivity to oxidative products (2-cyclooctenone and epoxycyclooctane) and reaction time with compound 2 as photocatalyst. (b) The relationship between the conversion/selectivity to oxidative products and recycling times with compound 2 as photocatalyst for five times. (c and d) The relationship between the conversion/selectivity and reaction time with compound 2,  $\text{PMo}_{12}$ , mttz and metal ion ( $\text{Ag}^+$ ) as photocatalysts.

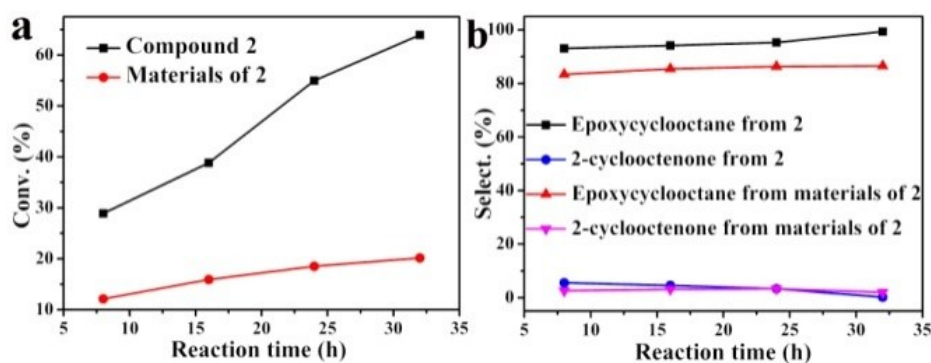

**Figure S11.** (a and b) The relationship between the conversion of *cis*-cyclooctene/selectivities to oxidation productions and reaction time with compound 2 and Materials of 2 as photocatalysts.

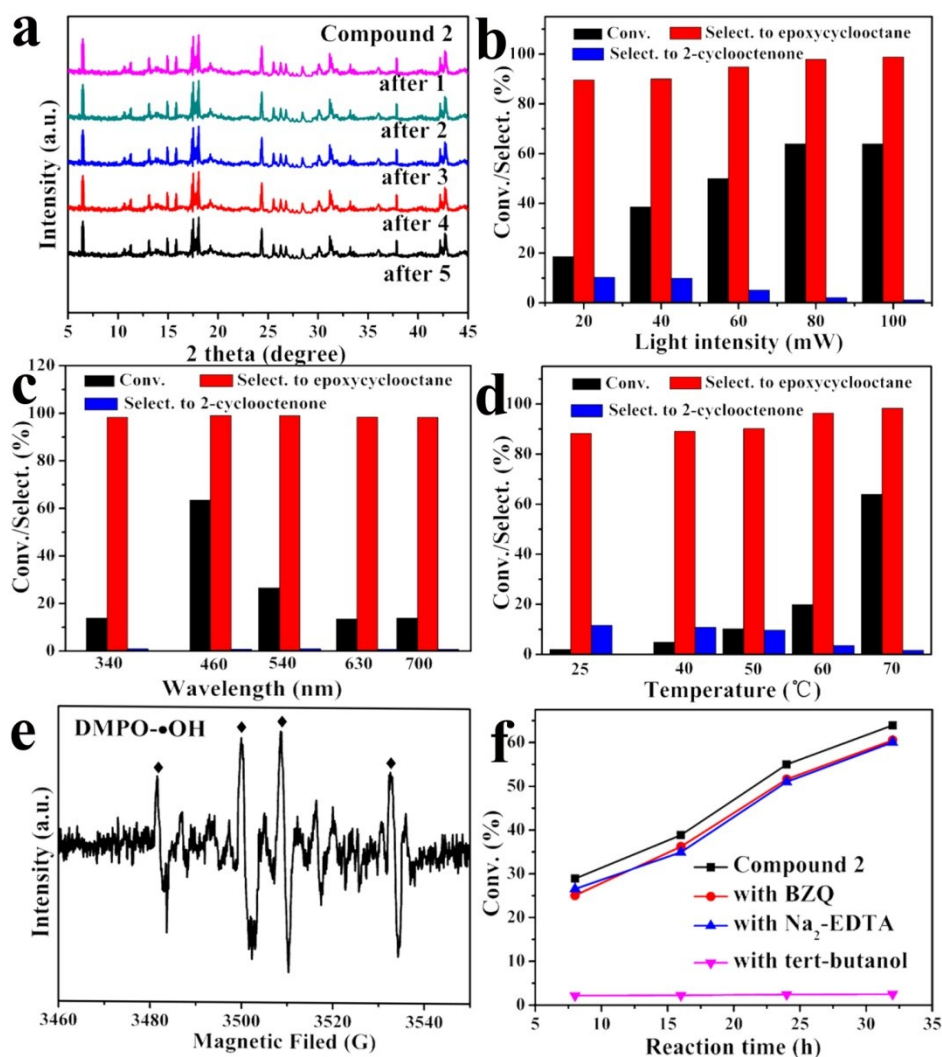

**Figure S12.** (a) XRD patterns of compound **2**: after 1, 2, 3, 4 and 5 times recycling. (b, c and d) The relationship between the conversion/selectivity and light intensity, wavelength, and reaction temperature with compound **2** as photocatalyst, respectively. (e) The ESR signals of the DMPO-•OH adducts in aqueous solution and compound **2** system. (f) The species trapping experiments for selective oxidation of *cis*-cyclooctene over compound **2** as photocatalyst under visible light irradiation.

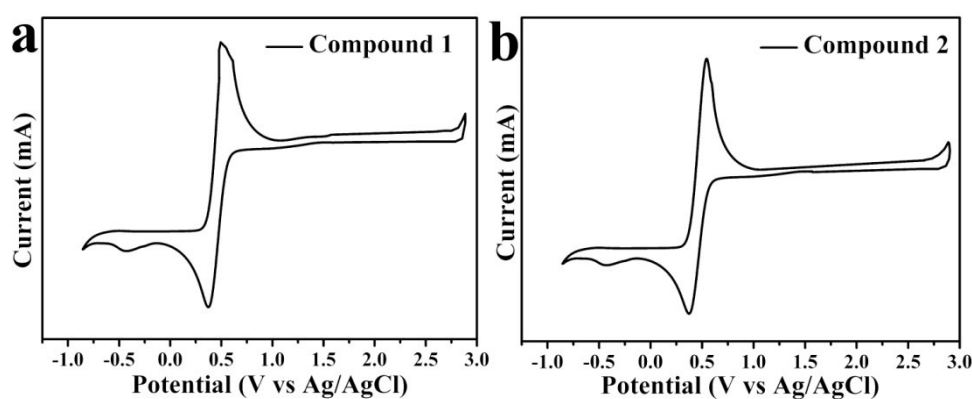

**Figure S13.** CV curves of compound **1** (a) and **2** (b).
